# Supplementary material
Source: HighWire-hosted journal article supplement (https://bmjopenquality.bmj.com/highwire/filestream/136040/field_highwire_adjunct_files/0/ds3478.docx)
Supplement: ds3478.docx [file ds3478.docx]

**Post Intervention measurements:**

**Figure 3.**

|  | Phlebotomy | Rewriting Drug charts | IV fluids | Discharge summaries | Antibiotics/  medications | Warfarin | Ressuciation decision |
| --- | --- | --- | --- | --- | --- | --- | --- |
| Sat4 | 1 | 2 | 2 | 1 | 0 | 3 | 1 |
| Sun4 | 0 | 1 | 0 | 0 | 0 | 4 | 0 |
| Sat5 | 0 | 1 | 1 | 0 | 0 | 2 | 0 |
| Sun5 | 0 | 0 | 1 | 0 | 0 | 3 | 0 |
| Sat6 | 0 | 2 | 2 | 0 | 0 | 2 | 0 |
| Sun6 | 0 | 0 | 0 | 0 | 0 | 3 | 0 |
| Total | 1 | 6 | 6 | 1 | 0 | 17 | 1 |

***COMPARISON OF THE RESULTS:***

***Figure 4***

|  | Phlebotomy | | Rewriting Drug charts | | IV fluids | | Discharge summaries | | Antibiotics  medications | | Warfarin | | Resuscitation decision | |
| --- | --- | --- | --- | --- | --- | --- | --- | --- | --- | --- | --- | --- | --- | --- |
| Sat | 2 | 1 | 3 | 2 | 5 | 2 | 2 | 1 | 3 | 0 | 7 | 3 | 1 | 1 |
| Sun | 0 | 0 | 1 | 1 | 2 | 0 | 0 | 0 | 1 | 0 | 4 | 4 | 0 | 0 |
| Sat | 1 | 0 | 2 | 1 | 4 | 1 | 1 | 0 | 2 | 0 | 6 | 2 | 2 | 0 |
| Sun | 1 | 0 | 0 | 0 | 2 | 1 | 0 | 0 | 0 | 0 | 1 | 3 | 0 | 0 |
| Sat | 2 | 0 | 2 | 2 | 4 | 2 | 0 | 0 | 4 | 0 | 8 | 2 | 1 | 0 |
| Sun | 1 | 0 | 1 | 0 | 3 | 0 | 1 | 0 | 0 | 0 | 3 | 3 | 0 | 0 |
| Total | 7 | 1 | 9 | 6 | 20 | 6 | 4 | 1 | 10 | 0 | 29 | 17 | 4 | 1 |

***Figure 5***

***Figure 6***
